# Supplementary material for: Structure-Function Relationship Between Handheld Photopic Negative Response and Macular GCIPL Thickness in Chronic Optic Neuropathy
Source: Research Square preprint supplement (doi:10.21203/rs.3.rs-7974474/v1), 2025-11-13
Supplement: Supplementary file 1 [file 2a26306db3b635451305d90f.xlsx]

## Sheet: Sheet1
Supplementary Table 3. Associations between visual field parameters and PhNR parameters analyzed using linear mixed-effects models.
		Control			ON			Row-wise p-value*	Global FDR p-value†
Outcome	Predictor	Slope (β ± SE)	95% CI	p-value	Slope (β ± SE)	95% CI	p-value
MD	a-wave amplitude	0.37 ± 2.93	-5.37 ~ 6.11	0.899	-4.61 ± 2.53	-9.58 ~ 0.36	0.207	0.306	0.806
MD	a-wave latency	-0.25 ± 2.27	-4.69 ~ 4.19	0.914	-6.55 ± 2.93	-12.29 ~ -0.81	0.076	0.143	0.511
MD	b-wave amplitude	0.13 ± 1.11	-2.05 ~ 2.31	0.909	-1.27 ± 0.34	-1.94 ~ -0.60	0.001	0.353	0.806
MD	b-wave latency	-0.82 ± 1.57	-3.90 ~ 2.26	0.602	4.57 ± 1.88	0.90 ~ 8.25	0.044	0.048	0.347
MD	PhNR minimum amplitude	-0.15 ± 1.84	-3.75 ~ 3.46	0.938	-4.72 ± 3.48	-11.54 ~ 2.10	0.377	0.377	0.814
MD	PhNR 72 amplitude	0.52 ± 3.19	-5.73 ~ 6.77	0.871	4.10 ± 1.98	0.22 ~ 7.97	0.116	0.518	0.952
MD	PhNR minimum latency	-0.04 ± 0.11	-0.25 ~ 0.18	0.752	-0.10 ± 0.17	-0.43 ~ 0.23	0.752	0.752	0.952
MD	P-ratio	4.45 ± 43.69	-81.18 ~ 90.09	0.919	-5.11 ± 23.41	-51.00 ~ 40.78	0.919	0.919	0.952
MD	W ratio	3.74 ± 34.91	-64.68 ~ 72.15	0.915	39.53 ± 65.05	-87.97 ~ 167.03	0.915	0.915	0.952
PSD	a-wave amplitude	0.61 ± 1.67	-2.66 ~ 3.88	0.716	1.70 ± 1.45	-1.13 ~ 4.53	0.716	0.716	0.952
PSD	a-wave latency	0.20 ± 1.29	-2.33 ~ 2.73	0.877	1.31 ± 1.67	-1.96 ~ 4.58	0.877	0.877	0.952
PSD	b-wave amplitude	0.15 ± 0.63	-1.09 ~ 1.40	0.810	0.32 ± 0.20	-0.06 ~ 0.70	0.303	0.810	0.952
PSD	b-wave latency	0.22 ± 0.90	-1.53 ~ 1.98	0.803	-0.61 ± 1.07	-2.71 ~ 1.49	0.803	0.803	0.952
PSD	PhNR minimum amplitude	-0.24 ± 1.05	-2.30 ~ 1.81	0.818	-2.00 ± 1.99	-5.89 ~ 1.89	0.658	0.658	0.952
PSD	PhNR 72 amplitude	0.52 ± 1.82	-3.05 ~ 4.08	0.777	1.95 ± 1.13	-0.27 ~ 4.16	0.254	0.761	0.952
PSD	PhNR minimum latency	0.02 ± 0.06	-0.10 ~ 0.14	0.747	-0.08 ± 0.10	-0.27 ~ 0.11	0.590	0.590	0.952
PSD	P-ratio	10.35 ± 24.91	-38.47 ~ 59.18	0.697	21.43 ± 13.35	-4.74 ~ 47.59	0.325	0.697	0.952
PSD	W ratio	-9.66 ± 19.90	-48.67 ~ 29.34	0.630	-33.81 ± 37.09	-106.50 ~ 38.89	0.630	0.630	0.952
VFI	a-wave amplitude	-0.64 ± 8.61	-17.51 ~ 16.22	0.941	-14.70 ± 7.45	-29.30 ~ -0.10	0.145	0.335	0.806
VFI	a-wave latency	0.99 ± 6.66	-12.06 ~ 14.05	0.882	-19.07 ± 8.61	-35.93 ~ -2.20	0.080	0.107	0.446
VFI	b-wave amplitude	-1.49 ± 3.27	-7.91 ~ 4.92	0.650	-4.06 ± 1.01	-6.04 ~ -2.09	0.000	0.650	0.952
VFI	b-wave latency	-3.46 ± 4.62	-12.51 ~ 5.59	0.457	11.98 ± 5.51	1.18 ~ 22.78	0.055	0.055	0.347
VFI	PhNR minimum amplitude	-0.92 ± 5.41	-11.52 ~ 9.69	0.866	-12.37 ± 10.23	-32.43 ~ 7.68	0.491	0.491	0.952
VFI	PhNR 72 amplitude	-3.08 ± 9.37	-21.45 ~ 15.28	0.744	11.32 ± 5.82	-0.08 ~ 22.72	0.155	0.297	0.806
VFI	PhNR minimum latency	0.04 ± 0.33	-0.60 ~ 0.68	0.906	-0.20 ± 0.50	-1.18 ~ 0.77	0.906	0.906	0.952
VFI	P-ratio	-47.16 ± 128.40	-298.82 ~ 204.49	0.872	-11.09 ± 68.81	-145.95 ~ 123.77	0.872	0.872	0.952
VFI	W ratio	5.11 ± 102.58	-195.94 ~ 206.16	0.960	113.23 ± 191.17	-261.46 ~ 487.92	0.931	0.931	0.952
