# Supplementary material for: Structure-Function Relationship Between Handheld Photopic Negative Response and Macular GCIPL Thickness in Chronic Optic Neuropathy
Source: Research Square preprint supplement (doi:10.21203/rs.3.rs-7974474/v1), 2025-11-13
Supplement: Supplementary file 2 [file 2e3e1730658806b9c8219325.xlsx]

## Sheet: Sheet1
Supplementary Table 2. Univariate regression eye analysis for parameters of visul field test using PhNR parameters as dependent variables.
Group	Outcome	Predictor	β ± SE	p (raw)	q (FDR)
Control eye	MD	a wave amplitude	0.430 ± 0.514	0.4110	0.8506
Control eye	MD	a wave latency	-0.896 ± 1.175	0.4539	0.8506
Control eye	MD	b wave amplitude	0.060 ± 0.188	0.7534	0.8970
Control eye	MD	b wave latency	-1.225 ± 0.748	0.1156	0.8126
Control eye	MD	PhNR minimum amplitude	-0.181 ± 0.268	0.5064	0.8506
Control eye	MD	PhNR72 amplitude	0.063 ± 0.332	0.8517	0.8970
Control eye	MD	PhNR minimum latency	0.009 ± 0.068	0.8970	0.8970
Control eye	MD	P ratio	-3.051 ± 5.250	0.5671	0.8506
Control eye	MD	W ratio	7.447 ± 5.385	0.1806	0.8126
Control eye	PSD	a wave amplitude	-0.154 ± 0.239	0.5278	0.7229
Control eye	PSD	a wave latency	0.564 ± 0.538	0.3059	0.7229
Control eye	PSD	b wave amplitude	-0.051 ± 0.087	0.5622	0.7229
Control eye	PSD	b wave latency	0.626 ± 0.342	0.0805	0.6683
Control eye	PSD	PhNR minimum amplitude	0.116 ± 0.123	0.3563	0.7229
Control eye	PSD	PhNR72 amplitude	-0.020 ± 0.154	0.8986	0.8986
Control eye	PSD	PhNR minimum latency	0.006 ± 0.032	0.8449	0.8986
Control eye	PSD	P ratio	1.923 ± 2.415	0.4344	0.7229
Control eye	PSD	W ratio	-3.708 ± 2.476	0.1485	0.6683
Control eye	VFI	a wave amplitude	1.067 ± 1.397	0.4530	0.7965
Control eye	VFI	a wave latency	-2.977 ± 3.167	0.3575	0.7965
Control eye	VFI	b wave amplitude	0.163 ± 0.510	0.7521	0.8461
Control eye	VFI	b wave latency	-3.551 ± 2.010	0.0912	0.7965
Control eye	VFI	PhNR minimum amplitude	-0.581 ± 0.724	0.4305	0.7965
Control eye	VFI	PhNR72 amplitude	0.148 ± 0.900	0.8706	0.8706
Control eye	VFI	PhNR minimum latency	0.071 ± 0.184	0.7060	0.8461
Control eye	VFI	P ratio	-9.051 ± 14.221	0.5310	0.7965
Control eye	VFI	W ratio	20.310 ± 14.600	0.1781	0.7965
ON eye	MD	a wave amplitude	-1.243 ± 1.538	0.4281	0.5504
ON eye	MD	a wave latency	0.109 ± 2.630	0.9674	0.9674
ON eye	MD	b wave amplitude	-0.934 ± 0.424	0.0389	0.2480
ON eye	MD	b wave latency	0.078 ± 1.540	0.9599	0.9674
ON eye	MD	PhNR minimum amplitude	0.264 ± 0.167	0.1289	0.2513
ON eye	MD	PhNR72 amplitude	-0.840 ± 0.670	0.2237	0.3355
ON eye	MD	PhNR minimum latency	-1.576 ± 0.776	0.0551	0.2480
ON eye	MD	P ratio	13.884 ± 9.042	0.1396	0.2513
ON eye	MD	W ratio	25.309 ± 15.377	0.1147	0.2513
ON eye	PSD	a wave amplitude	0.143 ± 0.689	0.8377	0.8377
ON eye	PSD	a wave latency	0.316 ± 1.159	0.7879	0.8377
ON eye	PSD	b wave amplitude	0.223 ± 0.202	0.2824	0.8377
ON eye	PSD	b wave latency	0.164 ± 0.679	0.8116	0.8377
ON eye	PSD	PhNR minimum amplitude	0.339 ± 0.367	0.3669	0.8377
ON eye	PSD	PhNR72 amplitude	0.252 ± 0.302	0.4129	0.8377
ON eye	PSD	PhNR minimum latency	-0.119 ± 0.073	0.1213	0.8377
ON eye	PSD	P ratio	-1.655 ± 4.194	0.6971	0.8377
ON eye	PSD	W ratio	-5.025 ± 7.128	0.4886	0.8377
ON eye	VFI	a wave amplitude	-4.536 ± 4.641	0.3395	0.4364
ON eye	VFI	a wave latency	-0.662 ± 7.989	0.9348	0.9630
ON eye	VFI	b wave amplitude	-3.049 ± 1.265	0.0252	0.2270
ON eye	VFI	b wave latency	-0.220 ± 4.677	0.9630	0.9630
ON eye	VFI	PhNR minimum amplitude	-4.694 ± 2.366	0.0605	0.2722
ON eye	VFI	PhNR72 amplitude	-2.722 ± 2.024	0.1930	0.2894
ON eye	VFI	PhNR minimum latency	0.759 ± 0.510	0.1512	0.2722
ON eye	VFI	P ratio	44.786 ± 27.269	0.1154	0.2722
ON eye	VFI	W ratio	70.777 ± 47.168	0.1484	0.2722
