# Supplementary material for: Structure-Function Relationship Between Handheld Photopic Negative Response and Macular GCIPL Thickness in Chronic Optic Neuropathy
Source: Research Square preprint supplement (doi:10.21203/rs.3.rs-7974474/v1), 2025-11-13
Supplement: Supplementary file 3 [file e64e342b90fe3544a82898b0.xlsx]

## Sheet: Sheet1
Group	Outcome	Predictor	β ± SE	p (raw)	q (FDR)
Control eye	GCIPL average	a wave amplitude	-0.336 ± 0.959	0.7293	0.8488
Control eye	GCIPL average	a wave latency	0.645 ± 2.203	0.7721	0.8488
Control eye	GCIPL average	b wave amplitude	0.113 ± 0.328	0.7326	0.8488
Control eye	GCIPL average	b wave latency	2.297 ± 1.363	0.1045	0.3135
Control eye	GCIPL average	PhNR minimum amplitude	-0.188 ± 0.485	0.7012	0.8488
Control eye	GCIPL average	PhNR72 amplitude	-0.990 ± 0.567	0.0934	0.3135
Control eye	GCIPL average	PhNR minimum latency	-0.106 ± 0.123	0.3989	0.8488
Control eye	GCIPL average	P ratio	15.812 ± 8.529	0.0756	0.3135
Control eye	GCIPL average	W ratio	1.847 ± 9.588	0.8488	0.8488
Control eye	GCIPL inferotemporal	a wave amplitude	0.587 ± 1.020	0.5703	0.9341
Control eye	GCIPL inferotemporal	a wave latency	-0.197 ± 2.357	0.9341	0.9341
Control eye	GCIPL inferotemporal	b wave amplitude	0.036 ± 0.351	0.9185	0.9341
Control eye	GCIPL inferotemporal	b wave latency	1.555 ± 1.505	0.3112	0.9341
Control eye	GCIPL inferotemporal	PhNR minimum amplitude	-0.067 ± 0.520	0.8981	0.9341
Control eye	GCIPL inferotemporal	PhNR72 amplitude	-0.645 ± 0.629	0.3146	0.9341
Control eye	GCIPL inferotemporal	PhNR minimum latency	-0.019 ± 0.133	0.8860	0.9341
Control eye	GCIPL inferotemporal	P ratio	10.122 ± 9.502	0.2970	0.9341
Control eye	GCIPL inferotemporal	W ratio	5.070 ± 10.198	0.6234	0.9341
Control eye	GCIPL minimum	a wave amplitude	-0.674 ± 0.976	0.4962	0.7351
Control eye	GCIPL minimum	a wave latency	0.694 ± 2.257	0.7609	0.7855
Control eye	GCIPL minimum	b wave amplitude	0.192 ± 0.335	0.5718	0.7351
Control eye	GCIPL minimum	b wave latency	2.228 ± 1.405	0.1254	0.3762
Control eye	GCIPL minimum	PhNR minimum amplitude	-0.374 ± 0.493	0.4557	0.7351
Control eye	GCIPL minimum	PhNR72 amplitude	-1.053 ± 0.578	0.0808	0.3762
Control eye	GCIPL minimum	PhNR minimum latency	-0.109 ± 0.126	0.3942	0.7351
Control eye	GCIPL minimum	P ratio	15.753 ± 8.771	0.0846	0.3762
Control eye	GCIPL minimum	W ratio	2.700 ± 9.817	0.7855	0.7855
Control eye	GCIPL superotemporal	a wave amplitude	0.087 ± 0.910	0.9247	0.9580
Control eye	GCIPL superotemporal	a wave latency	1.396 ± 2.070	0.5062	0.9112
Control eye	GCIPL superotemporal	b wave amplitude	0.074 ± 0.311	0.8133	0.9580
Control eye	GCIPL superotemporal	b wave latency	2.629 ± 1.256	0.0467	0.4200
Control eye	GCIPL superotemporal	PhNR minimum amplitude	0.025 ± 0.461	0.9580	0.9580
Control eye	GCIPL superotemporal	PhNR72 amplitude	-0.522 ± 0.559	0.3595	0.8776
Control eye	GCIPL superotemporal	PhNR minimum latency	-0.102 ± 0.116	0.3900	0.8776
Control eye	GCIPL superotemporal	P ratio	7.701 ± 8.471	0.3720	0.8776
Control eye	GCIPL superotemporal	W ratio	-1.069 ± 9.080	0.9072	0.9580
Control eye	RNFL average	a wave amplitude	-0.736 ± 1.246	0.5601	0.6955
Control eye	RNFL average	a wave latency	1.446 ± 2.865	0.6182	0.6955
Control eye	RNFL average	b wave amplitude	0.626 ± 0.411	0.1397	0.4190
Control eye	RNFL average	b wave latency	2.973 ± 1.781	0.1075	0.4190
Control eye	RNFL average	PhNR minimum amplitude	-0.644 ± 0.622	0.3104	0.4657
Control eye	RNFL average	PhNR72 amplitude	-1.337 ± 0.737	0.0817	0.4190
Control eye	RNFL average	PhNR minimum latency	-0.170 ± 0.159	0.2969	0.4657
Control eye	RNFL average	P ratio	13.151 ± 11.573	0.2666	0.4657
Control eye	RNFL average	W ratio	2.858 ± 12.506	0.8211	0.8211
Control eye	RNFL inferior	a wave amplitude	-2.060 ± 2.082	0.3318	0.5115
Control eye	RNFL inferior	a wave latency	-4.685 ± 4.780	0.3364	0.5115
Control eye	RNFL inferior	b wave amplitude	1.079 ± 0.693	0.1322	0.5115
Control eye	RNFL inferior	b wave latency	2.393 ± 3.139	0.4530	0.5824
Control eye	RNFL inferior	PhNR minimum amplitude	-1.054 ± 1.054	0.3269	0.5115
Control eye	RNFL inferior	PhNR72 amplitude	-2.397 ± 1.236	0.0638	0.5115
Control eye	RNFL inferior	PhNR minimum latency	-0.151 ± 0.274	0.5865	0.6599
Control eye	RNFL inferior	P ratio	19.130 ± 19.707	0.3410	0.5115
Control eye	RNFL inferior	W ratio	-2.190 ± 21.172	0.9184	0.9184
Control eye	RNFL nasal	a wave amplitude	-0.453 ± 1.127	0.6915	0.6915
Control eye	RNFL nasal	a wave latency	4.670 ± 2.422	0.0653	0.2939
Control eye	RNFL nasal	b wave amplitude	-0.351 ± 0.381	0.3657	0.5575
Control eye	RNFL nasal	b wave latency	5.145 ± 1.344	0.0008	0.0069
Control eye	RNFL nasal	PhNR minimum amplitude	0.513 ± 0.563	0.3717	0.5575
Control eye	RNFL nasal	PhNR72 amplitude	-0.392 ± 0.702	0.5817	0.6544
Control eye	RNFL nasal	PhNR minimum latency	-0.084 ± 0.146	0.5714	0.6544
Control eye	RNFL nasal	P ratio	16.789 ± 10.159	0.1109	0.3327
Control eye	RNFL nasal	W ratio	-10.318 ± 11.096	0.3613	0.5575
Control eye	RNFL superior	a wave amplitude	-2.623 ± 2.599	0.3226	0.5585
Control eye	RNFL superior	a wave latency	-0.313 ± 6.086	0.9594	0.9594
Control eye	RNFL superior	b wave amplitude	1.792 ± 0.833	0.0414	0.3726
Control eye	RNFL superior	b wave latency	3.546 ± 3.903	0.3724	0.5585
Control eye	RNFL superior	PhNR minimum amplitude	-1.510 ± 1.308	0.2592	0.5585
Control eye	RNFL superior	PhNR72 amplitude	-2.342 ± 1.589	0.1530	0.5191
Control eye	RNFL superior	PhNR minimum latency	-0.465 ± 0.331	0.1730	0.5191
Control eye	RNFL superior	P ratio	9.086 ± 25.016	0.7195	0.9251
Control eye	RNFL superior	W ratio	-5.798 ± 26.432	0.8281	0.9317
Control eye	RNFL temporal	a wave amplitude	1.865 ± 1.839	0.3204	0.9612
Control eye	RNFL temporal	a wave latency	6.153 ± 4.128	0.1486	0.6687
Control eye	RNFL temporal	b wave amplitude	0.013 ± 0.642	0.9835	0.9835
Control eye	RNFL temporal	b wave latency	0.668 ± 2.805	0.8136	0.9835
Control eye	RNFL temporal	PhNR minimum amplitude	-0.743 ± 0.939	0.4362	0.9815
Control eye	RNFL temporal	PhNR72 amplitude	-0.358 ± 1.170	0.7621	0.9835
Control eye	RNFL temporal	PhNR minimum latency	-0.036 ± 0.243	0.8836	0.9835
Control eye	RNFL temporal	P ratio	9.902 ± 17.641	0.5796	0.9835
Control eye	RNFL temporal	W ratio	32.522 ± 17.560	0.0759	0.6687
ON eye	GCIPL average	a wave amplitude	-1.281 ± 1.714	0.4617	0.5936
ON eye	GCIPL average	a wave latency	-4.264 ± 3.063	0.1762	0.3172
ON eye	GCIPL average	b wave amplitude	1.153 ± 0.483	0.0249	0.0561
ON eye	GCIPL average	b wave latency	0.033 ± 1.971	0.9867	0.9867
ON eye	GCIPL average	PhNR minimum amplitude	-2.429 ± 0.899	0.0122	0.0549
ON eye	GCIPL average	PhNR72 amplitude	-1.939 ± 0.789	0.0213	0.0561
ON eye	GCIPL average	PhNR minimum latency	-0.070 ± 0.190	0.7159	0.8053
ON eye	GCIPL average	P ratio	11.247 ± 10.206	0.2809	0.4214
ON eye	GCIPL average	W ratio	52.939 ± 16.008	0.0029	0.0257
ON eye	GCIPL inferotemporal	a wave amplitude	0.742 ± 1.965	0.7091	0.8478
ON eye	GCIPL inferotemporal	a wave latency	-4.367 ± 3.510	0.2249	0.4048
ON eye	GCIPL inferotemporal	b wave amplitude	1.085 ± 0.569	0.0683	0.1536
ON eye	GCIPL inferotemporal	b wave latency	-0.611 ± 2.238	0.7871	0.8478
ON eye	GCIPL inferotemporal	PhNR minimum amplitude	-2.854 ± 1.013	0.0093	0.0419
ON eye	GCIPL inferotemporal	PhNR72 amplitude	-2.151 ± 0.903	0.0251	0.0754
ON eye	GCIPL inferotemporal	PhNR minimum latency	-0.042 ± 0.216	0.8478	0.8478
ON eye	GCIPL inferotemporal	P ratio	12.978 ± 11.600	0.2739	0.4108
ON eye	GCIPL inferotemporal	W ratio	74.526 ± 15.951	0.0001	0.0008
ON eye	GCIPL minimum	a wave amplitude	-1.137 ± 1.824	0.5385	0.6923
ON eye	GCIPL minimum	a wave latency	-5.330 ± 3.200	0.1082	0.1948
ON eye	GCIPL minimum	b wave amplitude	1.008 ± 0.531	0.0693	0.1558
ON eye	GCIPL minimum	b wave latency	-0.955 ± 2.081	0.6504	0.7317
ON eye	GCIPL minimum	PhNR minimum amplitude	-2.371 ± 0.975	0.0225	0.0999
ON eye	GCIPL minimum	PhNR72 amplitude	-1.916 ± 0.851	0.0333	0.0999
ON eye	GCIPL minimum	PhNR minimum latency	-0.034 ± 0.202	0.8673	0.8673
ON eye	GCIPL minimum	P ratio	11.174 ± 10.856	0.3132	0.4699
ON eye	GCIPL minimum	W ratio	49.453 ± 17.792	0.0102	0.0917
ON eye	GCIPL superotemporal	a wave amplitude	-0.343 ± 1.599	0.8320	0.8320
ON eye	GCIPL superotemporal	a wave latency	-6.676 ± 2.615	0.0172	0.0574
ON eye	GCIPL superotemporal	b wave amplitude	1.108 ± 0.442	0.0191	0.0574
ON eye	GCIPL superotemporal	b wave latency	-1.549 ± 1.793	0.3959	0.5938
ON eye	GCIPL superotemporal	PhNR minimum amplitude	-1.806 ± 0.872	0.0488	0.1097
ON eye	GCIPL superotemporal	PhNR72 amplitude	-1.348 ± 0.766	0.0906	0.1630
ON eye	GCIPL superotemporal	PhNR minimum latency	-0.082 ± 0.175	0.6424	0.7227
ON eye	GCIPL superotemporal	P ratio	4.960 ± 9.598	0.6099	0.7227
ON eye	GCIPL superotemporal	W ratio	46.684 ± 15.062	0.0047	0.0427
ON eye	RNFL average	a wave amplitude	-1.265 ± 3.366	0.7101	0.9954
ON eye	RNFL average	a wave latency	0.369 ± 6.193	0.9530	0.9954
ON eye	RNFL average	b wave amplitude	1.849 ± 0.976	0.0696	0.6266
ON eye	RNFL average	b wave latency	4.431 ± 3.734	0.2465	0.9954
ON eye	RNFL average	PhNR minimum amplitude	-0.451 ± 1.988	0.8226	0.9954
ON eye	RNFL average	PhNR72 amplitude	-0.756 ± 1.706	0.6617	0.9954
ON eye	RNFL average	PhNR minimum latency	0.076 ± 0.370	0.8385	0.9954
ON eye	RNFL average	P ratio	-0.118 ± 20.355	0.9954	0.9954
ON eye	RNFL average	W ratio	20.533 ± 37.156	0.5854	0.9954
ON eye	RNFL inferior	a wave amplitude	-0.382 ± 4.727	0.9363	0.9795
ON eye	RNFL inferior	a wave latency	-0.225 ± 8.675	0.9795	0.9795
ON eye	RNFL inferior	b wave amplitude	3.269 ± 1.307	0.0193	0.1735
ON eye	RNFL inferior	b wave latency	5.327 ± 5.270	0.3218	0.9795
ON eye	RNFL inferior	PhNR minimum amplitude	-1.303 ± 2.776	0.6429	0.9795
ON eye	RNFL inferior	PhNR72 amplitude	-1.386 ± 2.384	0.5662	0.9795
ON eye	RNFL inferior	PhNR minimum latency	-0.136 ± 0.519	0.7955	0.9795
ON eye	RNFL inferior	P ratio	-2.372 ± 28.509	0.9344	0.9795
ON eye	RNFL inferior	W ratio	47.049 ± 51.513	0.3698	0.9795
ON eye	RNFL nasal	a wave amplitude	-2.457 ± 1.332	0.0770	0.3464
ON eye	RNFL nasal	a wave latency	1.477 ± 2.588	0.5734	0.9428
ON eye	RNFL nasal	b wave amplitude	0.420 ± 0.431	0.3391	0.9428
ON eye	RNFL nasal	b wave latency	4.423 ± 1.350	0.0031	0.0278
ON eye	RNFL nasal	PhNR minimum amplitude	-0.185 ± 0.836	0.8264	0.9428
ON eye	RNFL nasal	PhNR72 amplitude	-0.309 ± 0.718	0.6710	0.9428
ON eye	RNFL nasal	PhNR minimum latency	-0.028 ± 0.156	0.8609	0.9428
ON eye	RNFL nasal	P ratio	3.442 ± 8.534	0.6901	0.9428
ON eye	RNFL nasal	W ratio	-1.139 ± 15.722	0.9428	0.9428
ON eye	RNFL superior	a wave amplitude	-2.275 ± 5.863	0.7013	0.9597
ON eye	RNFL superior	a wave latency	-1.384 ± 10.786	0.8990	0.9597
ON eye	RNFL superior	b wave amplitude	3.187 ± 1.702	0.0729	0.6563
ON eye	RNFL superior	b wave latency	5.330 ± 6.601	0.4271	0.9597
ON eye	RNFL superior	PhNR minimum amplitude	0.662 ± 3.465	0.8500	0.9597
ON eye	RNFL superior	PhNR72 amplitude	-0.184 ± 2.984	0.9513	0.9597
ON eye	RNFL superior	PhNR minimum latency	0.189 ± 0.645	0.7718	0.9597
ON eye	RNFL superior	P ratio	-11.831 ± 35.383	0.7409	0.9597
ON eye	RNFL superior	W ratio	3.324 ± 65.124	0.9597	0.9597
ON eye	RNFL temporal	a wave amplitude	-0.033 ± 3.107	0.9916	0.9916
ON eye	RNFL temporal	a wave latency	1.315 ± 5.696	0.8194	0.9218
ON eye	RNFL temporal	b wave amplitude	0.569 ± 0.954	0.5565	0.7893
ON eye	RNFL temporal	b wave latency	2.686 ± 3.493	0.4491	0.7893
ON eye	RNFL temporal	PhNR minimum amplitude	-0.931 ± 1.823	0.6139	0.7893
ON eye	RNFL temporal	PhNR72 amplitude	-1.097 ± 1.562	0.4891	0.7893
ON eye	RNFL temporal	PhNR minimum latency	0.265 ± 0.337	0.4389	0.7893
ON eye	RNFL temporal	P ratio	9.926 ± 18.635	0.5990	0.7893
ON eye	RNFL temporal	W ratio	31.853 ± 33.822	0.3553	0.7893
